# Supplementary material
Source: publisher figshare collection journal article supplement (https://geolsoc.figshare.com/ndownloader/files/31096413)
Supplement: Supplementary file 1 [file 31096413]

## Sheet: Age Model
BKH boundary	GPTS	0	sed rate
(meters)	(Ma)	0	(m/Myr)
39.5	36.7	C16n.2n
130	36.051	C16n.2n	139.445
171	35.892	C16n.ln	257.862
190	35.706	C16n.ln	102.151
210.5	35.294	15n	49.7573
270.5	34.999	15n	203.39
600.5	33.705	13n	255.023
776	33.157	13n	320.255
1680	31.034	12n	425.813
1909.8	30.591	12n	518.736
2238.9	29.97	11n	529.952
2512.45	29.527	11n	617.494
2568.2	29.477	11n	1115
2769.9	29.183	11n	686.054
4517.15	25.987	8n	315.411
4661.45	25.099	8n	162.5
4704.45	24.984	7An	373.913
4885.8	24.761	7An	813.229
5019.4	24.474	7n	465.505
5198.05	23.962	7n	348.926
5507.45	23.295	C6Cn.3n	463.868
5546.7	23.233	C6Cn.3n	633.065
5625.65	23.03	C6Cn.2n	388.916
5674.3	22.902	C6Cn.2n	380.078
5703.1	22.754	C6Cnln	194.595
5763.1	22.564	C6Cnln	315.789
5842.8	22.268	6Bn	269.257
6026.95	21.767	6Bn	367.565
6469.55	20.709	C6An.2n	418.336
6685.4	20.439	C6An.2n	799.444
6816.8	20.213	C6An.ln	581.416
6892.2	20.04	C6An.ln	435.838
7042.65	19.722	6n	473.113
7350.4	18.748	6n	315.965

## Sheet: MDA Summary
Sample	Stratigraphic level in Horton et al. (2001) Chuquichambi section (m)	Stratigraphic level in Horton et al. (2001) Chuquichambi section (km)	Pmag Age (Ma)	MDA (wighted mean MSWD ~1, Ma)	2sigma	n	MDA (Maximum Likelihood, Ma)	2sigma	MDA (Gaussian fit to youngest PDP peak, Ma)	2sigma
300618-07	6690	6.69	20.4332	23	0.82	331	23.43	1.61	23.1	2.001
300618-06	4125	4.125	27.2078	29	0.59	327	29.16	1.16	28.82	2.909
300618-05	2775	2.775	29.1756	27.2	1.6	392	28.03	2.76	27	1.551
CQT-2	2439	2.439	29.5924	86.3485	1.80123	69	86.3	1.77	86.3	1.499
CQT-5	2092	2.092	30.2398	74.2283	0.974195	73	74.2	0.98	74.23	0.7041
300618-04	727	0.727	33.209	35.1	1.38	337	37.89	1.73	37.4	2.102
300618-03	530	0.53	33.7231	39.5	1.7	333	40.58	3.49	39.8	2.167
300618-02	175	0.175	35.8765	39.1	1.7	345	43.55	2.24	39.7	1.167
CQT-1	163	0.163	35.8143	78.0156	3.10182	74	78	3.14	78	1.67
300618-01	-50	-0.05	N/A	38	1.8	341	39.84	3.75	39.9	3.855
290618-02	-700	-0.7	N/A	35.4	0.5	312	36.27	0.99	35.54	4.674

## Sheet: Integrated Chronology
Magnetostratigraphy			DZ				Palynology						40Ar/39Ar
Age (Ma)	Stratigraphic Height (km)		Detrital zircon U-Pb MDA		Stratigraphic Height		Range top (Ma)	Range Bottom (Ma)	Midpoint	Uncertained	km		age (Ma)	2sigma	km
36.7	0.0395		23	0.82	6.69		41.2	27.82	34.51	6.69	0.079		22	1.8	6.445
36.051	0.13		29	0.59	4.125		41.2	33.9	37.55	3.65	2.074		20	0.7	6.927
35.892	0.171		27.2	1.6	2.775		41.2	23.03	32.115	9.085	2.128		19.93	0.14	6.949
35.706	0.19		86.3485	1.80123	2.439		41.2	33.9	37.55	3.65	2.298		19.1	0.7	7.127
35.294	0.2105		74.2283	0.974195	2.092		33.9	23.03	28.465	5.435	4.513		19.01	0.64	7.336
34.999	0.2705		35.1	1.38	0.727
33.705	0.6005		39.5	1.7	0.53
33.157	0.776		39.1	1.7	0.175
31.034	1.68		78.0156	3.10182	0.163
30.591	1.9098		38	1.8	-0.05
29.97	2.2389		35.4	0.5	-0.7
29.527	2.51245
29.477	2.5682
29.183	2.7699
25.987	4.51715
25.099	4.66145
24.984	4.70445
24.761	4.8858
24.474	5.0194
23.962	5.19805
23.295	5.50745
23.233	5.5467
23.03	5.62565
22.902	5.6743
22.754	5.7031
22.564	5.7631
22.268	5.8428
21.767	6.02695
20.709	6.46955
20.439	6.6854
20.213	6.8168
20.04	6.8922
19.722	7.04265
18.748	7.3504

## Sheet: 290618-02
Age	2Sigma	MDA	2sigma
30.5441	4.29517	35.4	0.5
31.003	4.53881
31.0863	4.49236
31.2101	5.54077
31.2367	5.11249
31.6366	4.9265
31.797	3.01594
32.2323	3.33439
32.798	4.11593
32.8538	6.49327
33.2711	4.13318
33.3277	5.36095
33.3695	4.60686
33.3942	3.4833
33.4033	5.67607
33.4441	4.55741
33.4631	5.073
33.5669	4.08035
33.7242	4.38996
33.9402	4.21978
34.246	3.46188
34.3688	5.73286
34.4212	4.49029
34.485	5.35942
34.5762	4.14869
34.6492	4.43771
34.83	4.68613
34.933	4.3524
35.0961	4.4452
35.1294	3.93556
35.1506	3.23376
35.2297	3.30458
35.3245	6.25072
35.3436	5.74221
35.3572	3.53169
35.5263	3.31665
35.6206	6.01911
35.716	2.69764
35.719	5.23914
35.7321	4.83742
35.7914	4.26374
35.8865	4.59556
36.0474	6.3389
36.0806	2.97582
36.0857	7.08583
36.093	5.82087
36.1387	3.64729
36.1521	5.56781
36.2502	4.38574
36.3603	3.06541
36.3792	3.47239
36.4278	5.76176
36.5298	5.76147
36.5742	6.14281
36.7554	6.97787
36.8714	6.28177
36.917	5.50159
36.9714	5.53296
36.9751	4.30155
37.0559	5.66315
37.057	6.34315
37.2236	2.6369
37.2499	6.55565
37.3027	4.80346
37.6401	3.56527
37.9572	4.362
38.1159	2.28266
38.7639	3.88092
38.8348	3.01207
39.0803	4.42617
39.4577	5.61108
39.4953	5.02712
39.6093	4.76273

## Sheet: 300618-01
35.4525	3.55154	38	1.8
37.281	4.32849
38.0352	4.8822
38.5188	4.85322
40.2607	3.18452

## Sheet: CQT-1
78.0156	3.10182	78.0156	3.10182
112.351	6.3708
128.331	9.22473

## Sheet: 300618-02
35.5613	3.68353	39.1	1.7
37.4234	5.21432
38.7427	4.16513
39.3363	4.03337
39.4892	5.35329
41.3484	5.29228
42.347	4.68197
42.4916	6.9012

## Sheet: 300618-03
37.7582	3.18509	39.5	1.7
39.863	2.9125
40.5809	2.96112

## Sheet: 300618-04
34.211	1.67889	35.1	1.38
36.8572	2.9674
36.9399	4.31558

## Sheet: CQT-5
74.2283	0.974195	74.2283	0.974195
92.0052	0.950058
92.6098	0.919478

[truncated: 4 more sheets: CQT-2, 300618-05, 300618-06, 300618-07]
